# Supplementary material for: Application of magnetic field (MF) as an effective method to improve the activity of immobilized Candida antarctica lipase B (CALB)
Source: Royal Society of Chemistry journal article supplement (doi:10.1039/d2cy00628f), 2022-01-01
Supplement: d2cy00628f1.pdf [file d2cy00628f1.pdf]

# Magnetic field (MF): an effective method to improve the activity of immobilized *Candida antarctica* lipase B (CALB)

*Hong Hai Wang<sup>a, b, \*</sup>, Yu Zhang<sup>a, b</sup>, Wen Da Yue<sup>a, b</sup>, Jun Liang<sup>a, b</sup>, Wei Yi Su<sup>a, b</sup>*

1. School of Chemical Engineering and Technology, Hebei University of Technology, Tianjin 300130, China
2. The National and Local Joint Engineering Laboratory for Energy Conservation of Chemical Process Integration and Resources Utilization, Tianjin 300130, China

## Corresponding Author:

Honghai Wang\*: ctstwhh@hebut.edu.cn

Telephone: +8613902122829.

## Authors:

Yu Zhang: 13820840996@163.com

Wenda Yue: ctstyuewenda@163.com

Jun Liang: 18035142320@163.com

Weiyi Su: suweiyi@hebut.edu.cn

## Supporting Information

Activity data of enzyme under different magnetic field intensity and time (**Table S1**).

FT-IR analysis results (**Fig. S1**).

**Table S1.** Effect of magnetization time and intensity<sup>a</sup>

| MF (T) | Time (h) |        |        |        |        |
|--------|----------|--------|--------|--------|--------|
|        | 12       | 24     | 36     | 48     | 60     |
| 0      | 1058.9   | 845.2  | 500.1  | 492.3  | 484.0  |
| 0.075  | 1065.9   | 867.2  | 478.1  | 483.3  | 482.4  |
| 0.1    | 1077.8   | 869.6  | 659.4  | 663.7  | 692.1  |
| 0.125  | 1078.1   | 1046.3 | 904.5  | 928.5  | 935.9  |
| 0.15   | 1078.2   | 1031.4 | 1055.4 | 1076.3 | 1078.4 |
| 0.175  | 1088.2   | 1161.9 | 1182.9 | 1192   | 1184.8 |
| 0.2    | 1044.4   | 859.1  | 883.8  | 809.9  | 802.7  |
| 0.225  | 775.4    | 499.7  | 501.2  | 452.7  | 492.8  |
| 0.25   | 639.1    | 302.2  | 284.2  | 247.5  | 312.2  |

a. The data in the table are the catalytic activity of the sample(a.u.)

| Fitting Results |          |          |          |         |          |             |
|-----------------|----------|----------|----------|---------|----------|-------------|
| 波峰序号            | 峰值类型     | 拟合数据波峰面积 | FWHM     | 最大高度    | 波峰加权平均中心 | 拟合数据波峰面积百分比 |
| 1               | Gaussian | 6.16494  | 10.19288 | 0.57034 | 1612.198 | 7.63567     |
| 2               | Gaussian | 7.59198  | 9.66681  | 0.7378  | 1619.912 | 9.40315     |
| 3               | Gaussian | 10.49264 | 12.96154 | 0.7605  | 1625.698 | 12.9958     |
| 4               | Gaussian | 11.39535 | 12.38241 | 0.86455 | 1633.411 | 14.11386    |
| 5               | Gaussian | 8.63696  | 8.67847  | 0.93494 | 1643.054 | 10.69742    |
| 6               | Gaussian | 6.97149  | 5.75213  | 1.13858 | 1650.768 | 8.63463     |
| 7               | Gaussian | 7.14482  | 6.99927  | 0.95897 | 1658.481 | 8.84931     |
| 8               | Gaussian | 6.95549  | 8.20002  | 0.79686 | 1666.195 | 8.61482     |
| 9               | Gaussian | 5.06622  | 7.23402  | 0.65792 | 1673.909 | 6.27484     |
| 10              | Gaussian | 4.52805  | 5.19289  | 0.81916 | 1681.623 | 5.60827     |
| 11              | Gaussian | 2.99834  | 7.83168  | 0.35975 | 1689.337 | 3.71364     |
| 12              | Gaussian | 2.79242  | 10.73728 | 0.30496 | 1697.051 | 3.4586      |

  

| Fitting Results |          |          |          |         |          |             |
|-----------------|----------|----------|----------|---------|----------|-------------|
| 波峰序号            | 峰值类型     | 拟合数据波峰面积 | FWHM     | 最大高度    | 波峰加权平均中心 | 拟合数据波峰面积百分比 |
| 1               | Gaussian | 3.74465  | 7.43739  | 0.47354 | 1610.27  | 4.97077     |
| 2               | Gaussian | 6.21849  | 8.32656  | 0.7016  | 1617.984 | 8.25463     |
| 3               | Gaussian | 12.00959 | 13.75111 | 0.82046 | 1629.554 | 15.94194    |
| 4               | Gaussian | 11.52118 | 11.71242 | 0.9241  | 1639.197 | 15.29362    |
| 5               | Gaussian | 13.82487 | 15.23396 | 0.85254 | 1648.839 | 18.35162    |
| 6               | Gaussian | 10.80365 | 12.8257  | 0.79133 | 1658.481 | 14.34115    |
| 7               | Gaussian | 7.487    | 10.35526 | 0.67923 | 1666.195 | 9.9385      |
| 8               | Gaussian | 4.71064  | 8.50439  | 0.52036 | 1673.909 | 6.25306     |
| 9               | Gaussian | 3.20777  | 5.95742  | 0.50584 | 1681.623 | 4.2581      |
| 10              | Gaussian | 1.80544  | 7.5014   | 0.22614 | 1689.337 | 2.39661     |

  

| Fitting Results |          |          |          |         |          |             |
|-----------------|----------|----------|----------|---------|----------|-------------|
| 波峰序号            | 峰值类型     | 拟合数据波峰面积 | FWHM     | 最大高度    | 波峰加权平均中心 | 拟合数据波峰面积百分比 |
| 1               | Gaussian | 2.37583  | 10.65375 | 0.21061 | 1612.198 | 6.34831     |
| 2               | Gaussian | 3.55181  | 12.22736 | 0.27292 | 1619.912 | 9.49059     |
| 3               | Gaussian | 10.63534 | 36.92413 | 0.28631 | 1625.698 | 28.41806    |
| 4               | Gaussian | 4.0757   | 11.35183 | 0.33729 | 1633.411 | 10.89044    |
| 5               | Gaussian | 3.7506   | 9.42992  | 0.37365 | 1643.054 | 10.02176    |
| 6               | Gaussian | 2.72268  | 6.11433  | 0.41833 | 1650.768 | 7.27511     |
| 7               | Gaussian | 2.77172  | 6.92926  | 0.37578 | 1658.481 | 7.40615     |
| 8               | Gaussian | 2.64122  | 7.78399  | 0.31877 | 1668.124 | 7.05746     |
| 9               | Gaussian | 1.73314  | 6.40152  | 0.25434 | 1673.909 | 4.63102     |
| 10              | Gaussian | 1.71207  | 4.84766  | 0.33178 | 1681.623 | 4.57471     |
| 11              | Gaussian | 1.45446  | 9.10272  | 0.15031 | 1689.337 | 3.88638     |

  

| Fitting Results |          |          |          |         |          |             |
|-----------------|----------|----------|----------|---------|----------|-------------|
| 波峰序号            | 峰值类型     | 拟合数据波峰面积 | FWHM     | 最大高度    | 波峰加权平均中心 | 拟合数据波峰面积百分比 |
| 1               | Gaussian | 0.71921  | 4.65661  | 0.1451  | 1610.27  | 4.50376     |
| 2               | Gaussian | 1.10757  | 4.68994  | 0.22186 | 1617.984 | 6.93568     |
| 3               | Gaussian | 1.78534  | 6.70062  | 0.25031 | 1629.554 | 11.17995    |
| 4               | Gaussian | 2.03429  | 6.18769  | 0.30885 | 1639.197 | 12.73889    |
| 5               | Gaussian | 1.7408   | 6.09658  | 0.26824 | 1648.839 | 10.90103    |
| 6               | Gaussian | 1.7974   | 6.16428  | 0.27392 | 1656.553 | 11.25544    |
| 7               | Gaussian | 1.94121  | 9.02874  | 0.20198 | 1664.267 | 12.15598    |
| 8               | Gaussian | 2.02172  | 12.42274 | 0.15289 | 1671.981 | 12.66016    |
| 9               | Gaussian | 1.61822  | 10.50402 | 0.14473 | 1677.766 | 10.13339    |
| 10              | Gaussian | 1.20339  | 10.75925 | 0.10524 | 1687.408 | 7.53572     |

**Fig. S1** Fitting result of FT-IR (a) 0 T, (b) 0.125 T, (c) 0.15 T, (d) 0.175 T
